# Supplementary material for: Facile construction of a polydopamine-based hydrophobic surface for protection of metals against corrosion
Source: Royal Society of Chemistry journal article supplement (doi:10.1039/c7ra00267j), 2017-01-01
Supplement: c7ra00267j1.pdf [file c7ra00267j1.pdf]

## Supplementary Information

### Facile Construction of Polydopamine-based Hydrophobic Surface for Metal against Corrosion

Nan Wei, Yueyue Jiang, Ye Ying\*, Xiaoyu Guo, Yiping Wu, Ying Wen, Haifeng Yang\*

*The Education Ministry Key Lab of Resource Chemistry, Shanghai Key Laboratory of Rare Earth Functional Materials and Department of Chemistry, Shanghai Normal University, Shanghai 200234, PR China*

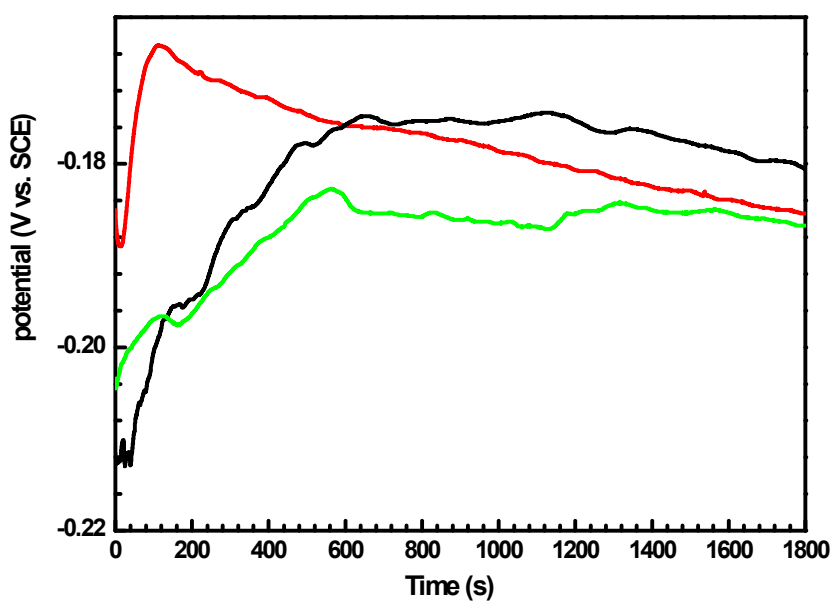

Fig. S1 The open circuit potential versus time of PDA@Cu samples recorded in 3 wt.% NaCl aqueous solution for three times.

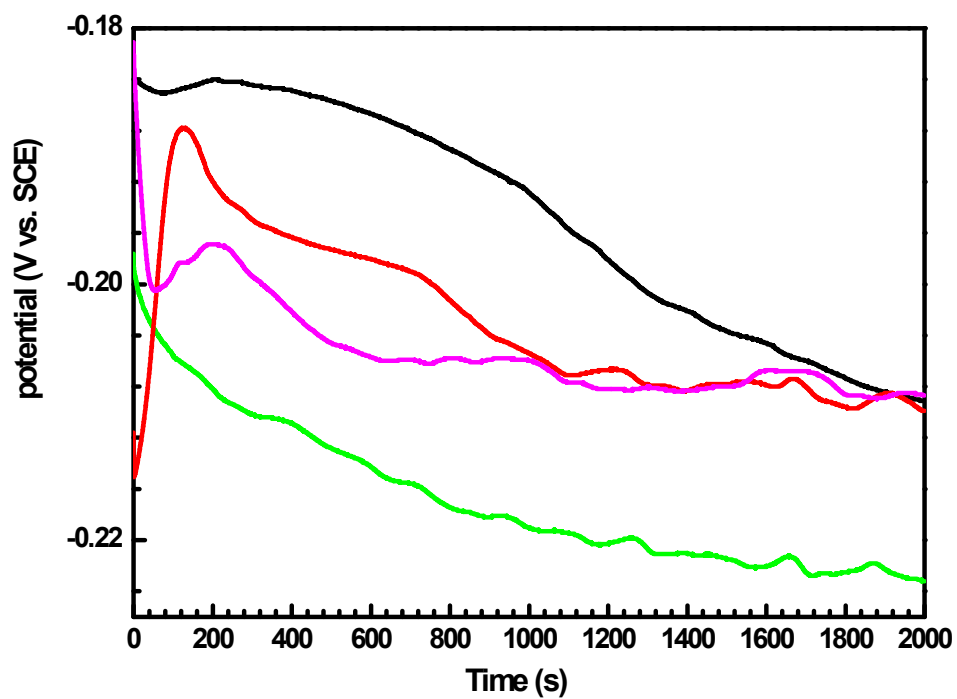

Fig. S2 The open circuit potential versus time of 1-DT@Cu samples recorded in 3 wt.% NaCl aqueous solution for four times.
